# Supplementary material for: Efficient solar-driven steam generation for clean water production using a low-cost and scalable natural rubber composite sponge
Source: Royal Society of Chemistry journal article supplement (doi:10.1039/d4ew00094c), 2024-01-01
Supplement: d4ew00094c1.pdf [file d4ew00094c1.pdf]

## Supporting Information

### **Efficient Solar-Driven Steam Generation for Clean Water Production using a Low-cost and Scalable Natural Rubber Composite Sponge**

Parichart Onsri<sup>a</sup>, Piyatida Thaveemas<sup>a</sup>, Pongthep Prajongtat<sup>b</sup>, Whijitra Suvandee<sup>b</sup>,  
Supanna Techasakul<sup>c</sup>, Laemthong Chuenchom<sup>a,d,\*</sup>, and Decha Dechtrirat<sup>b,c,e,\*</sup>

<sup>a</sup> Division of Physical Science, Faculty of Science, Prince of Songkla University, Songkhla  
90112, Thailand

<sup>b</sup> Department of Materials Science, Faculty of Science, Kasetsart University, Bangkok 10900,  
Thailand

<sup>c</sup> Laboratory of Organic Synthesis, Chulabhorn Research Institute, Bangkok 10210, Thailand

<sup>d</sup> Center of Excellence for Innovation in Chemistry, Faculty of Science, Prince of Songkla  
University, Songkhla 90112, Thailand

<sup>e</sup> Specialized Center of Rubber and Polymer Materials for Agriculture and Industry (RPM),  
Faculty of Science, Kasetsart University, Bangkok 10900, Thailand

\* Corresponding author; E-mail address: laemthong.c@psu.ac.th, fscidcd@ku.ac.th

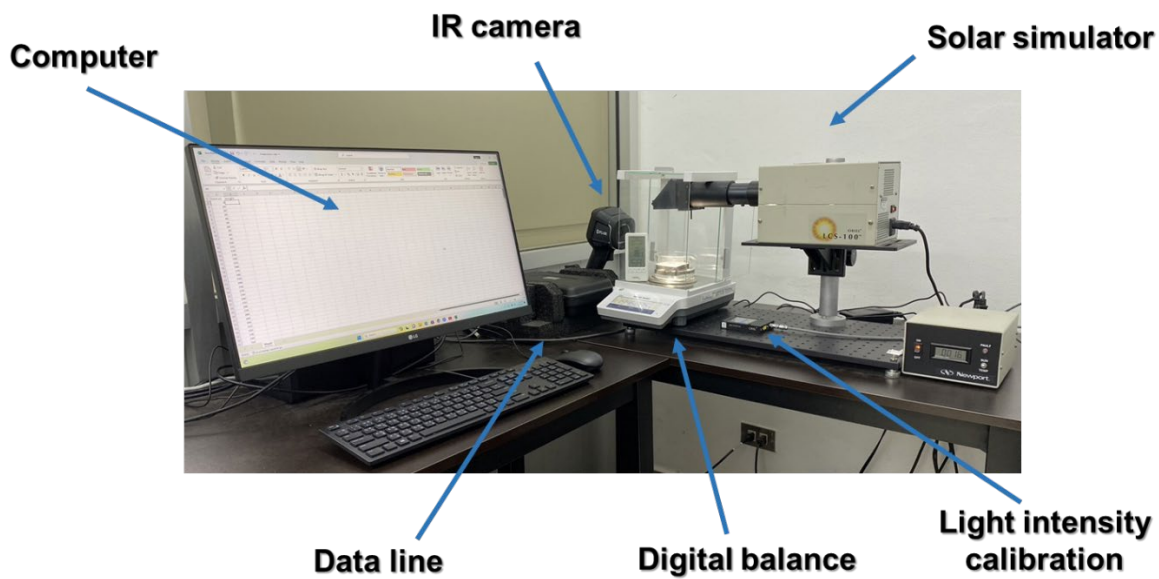

**Fig. S1** The solar-driven vaporization setup

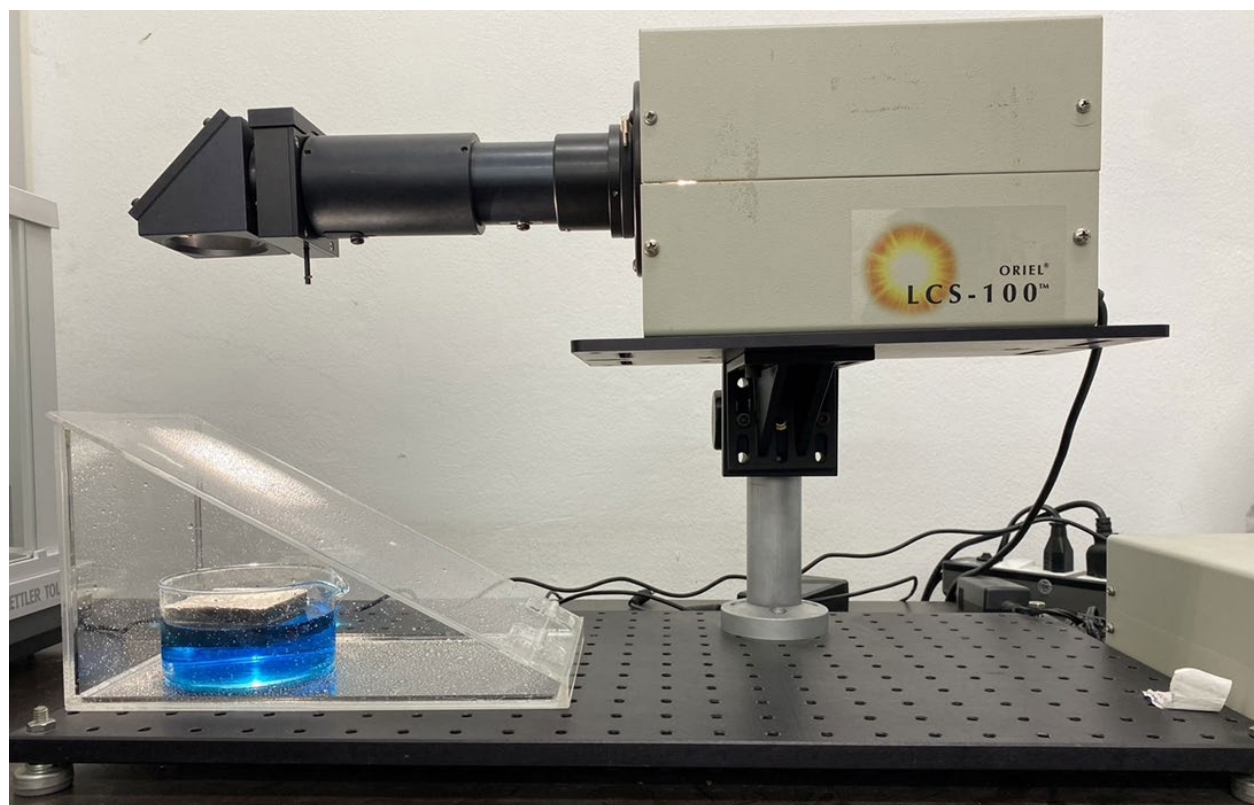

**Fig. S2** Desalination and clean water production setup

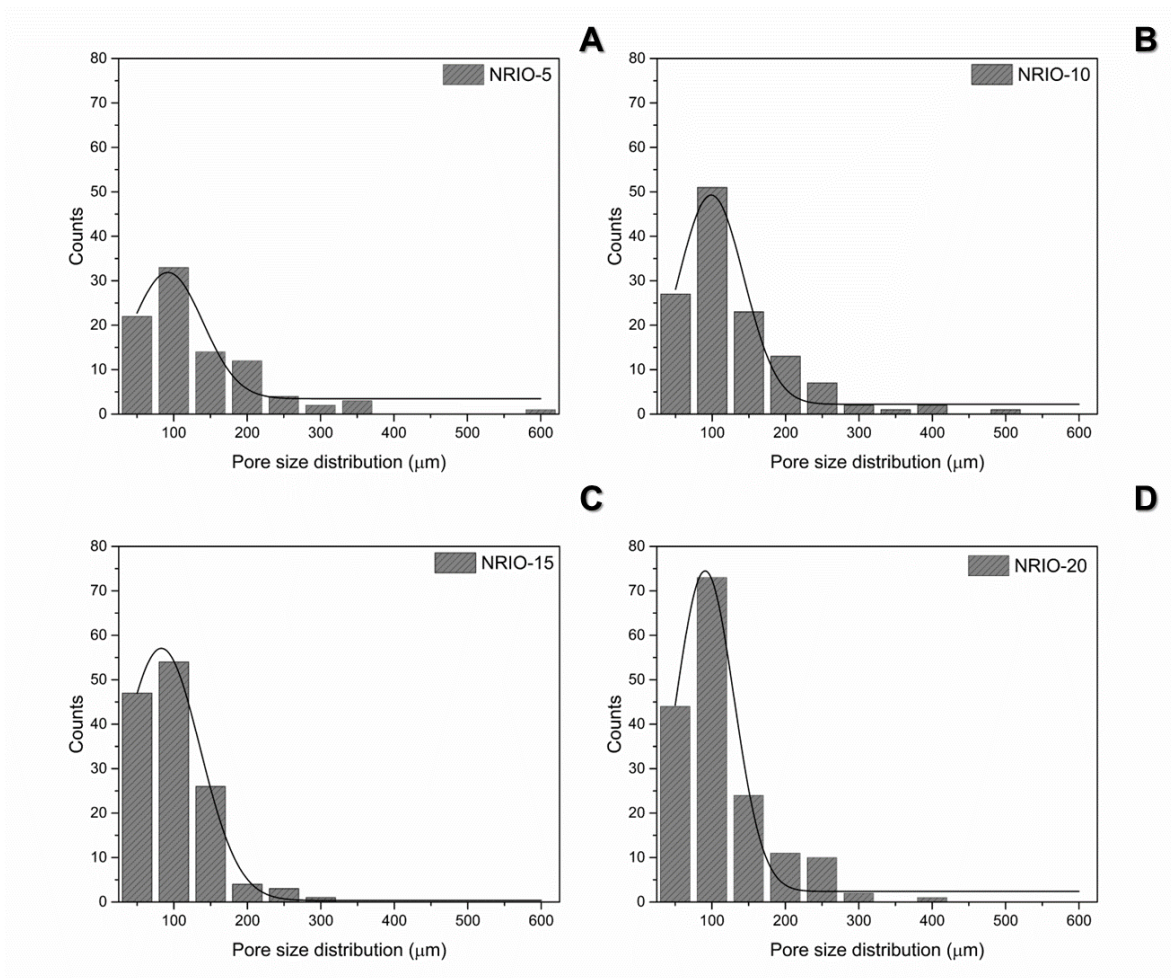

**Fig. S3** Pore size distributions of all prepared samples measured from SEM images in Fig. 2A using Image J software and analyzed by Gaussian fitting

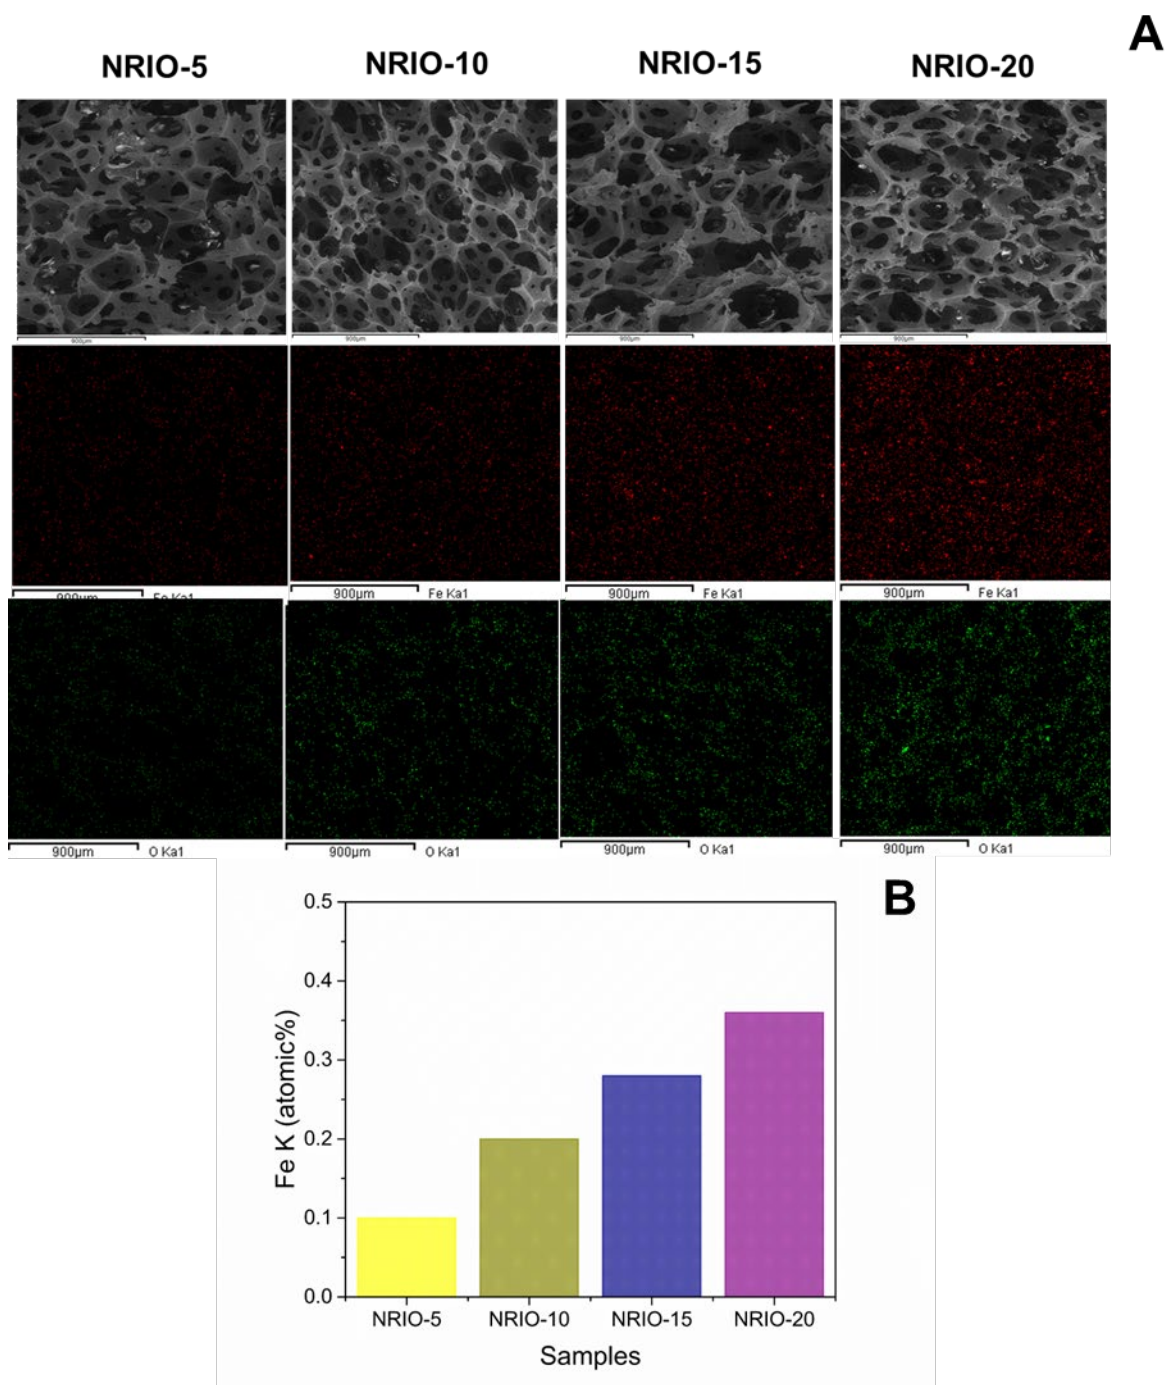

**Fig. S4** A) SEM/EDS analysis of Fe and O elements and B) Fe atomic% of the composite sponges

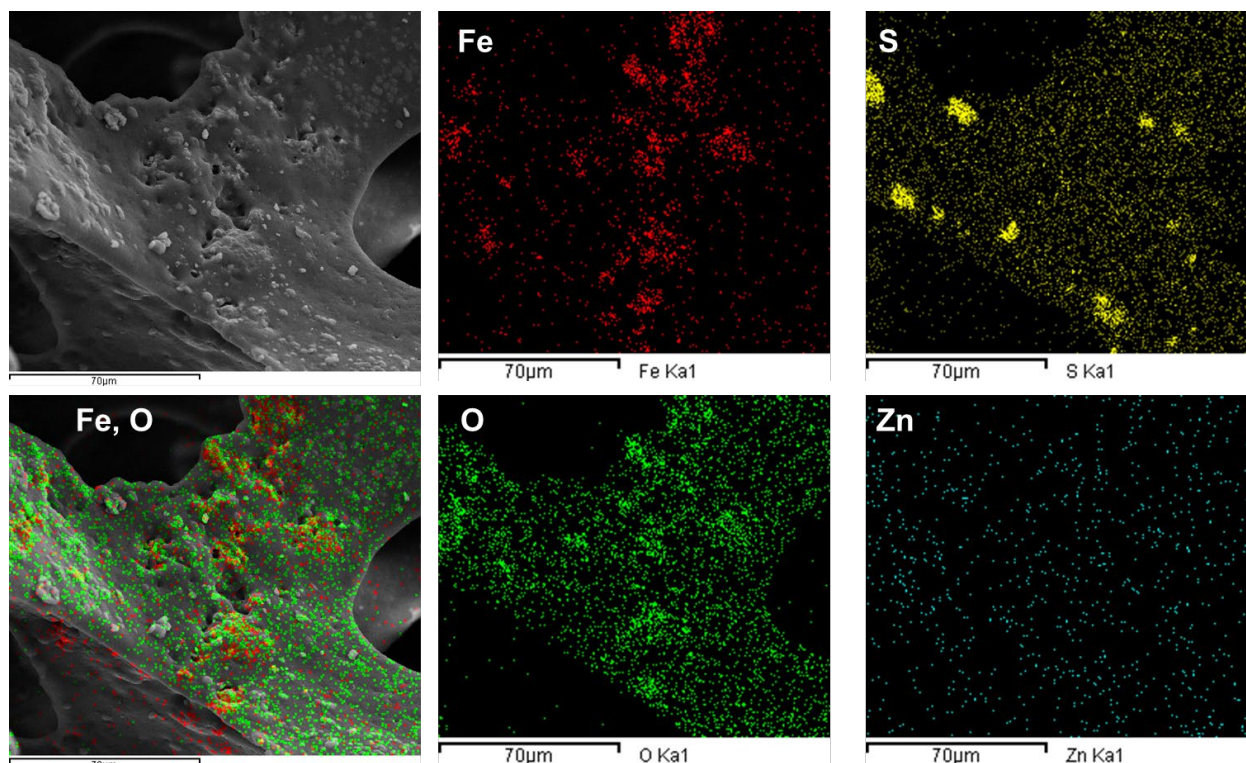

**Fig. S5** SEM/EDS elemental mapping on the cross-section of NRIO-20 at  $\times 1000$  magnification

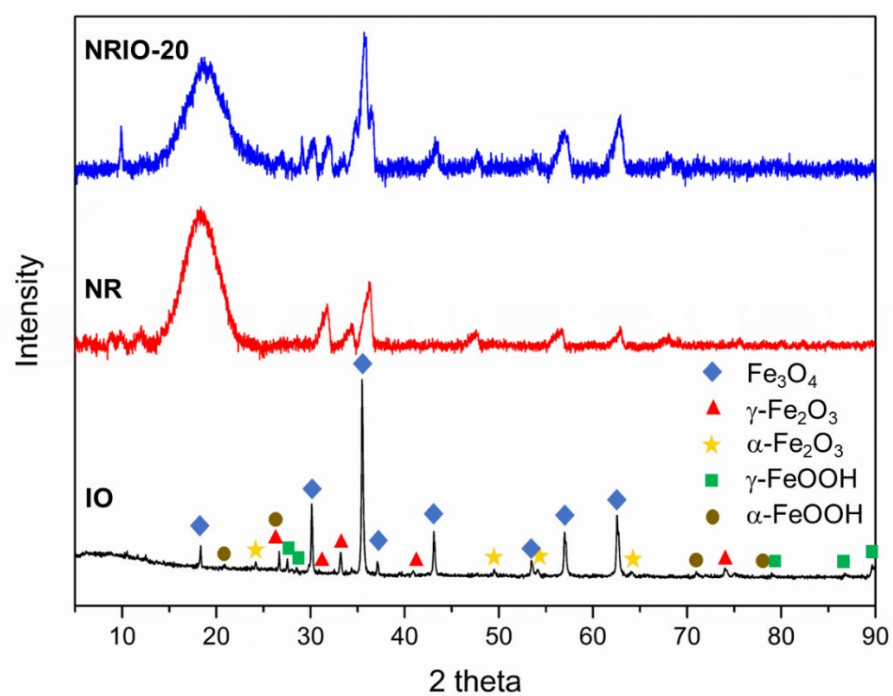

**Fig. S6** XRD patterns of NRIO-20, NR, and IO

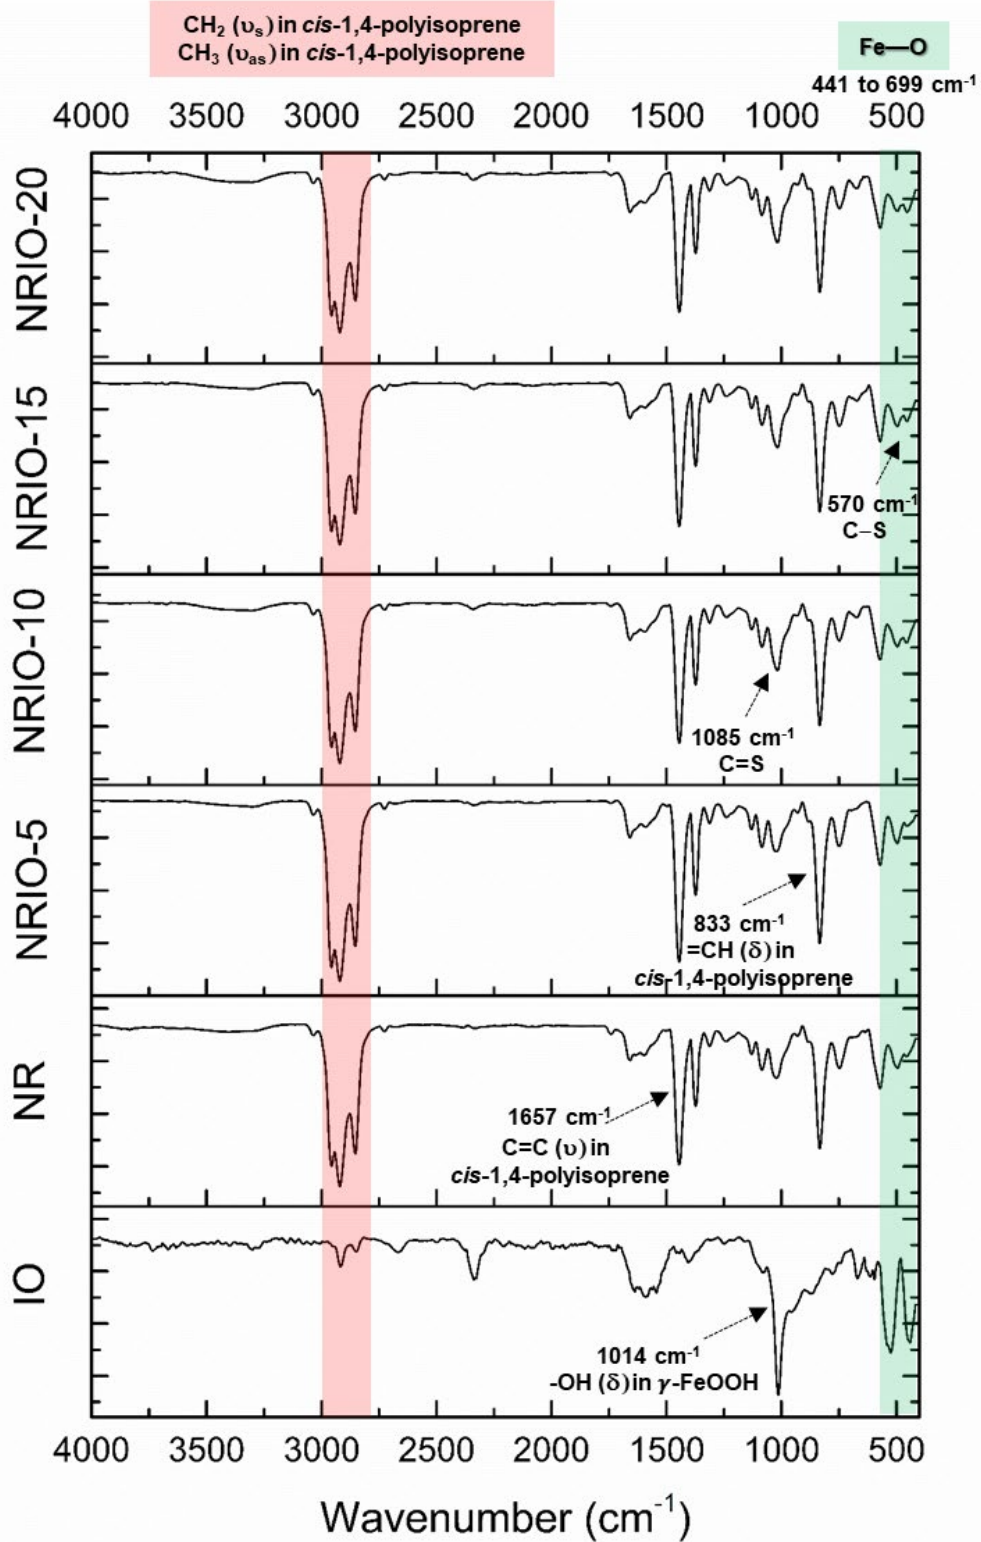

Fig. S7 ATR-FTIR spectra of all samples

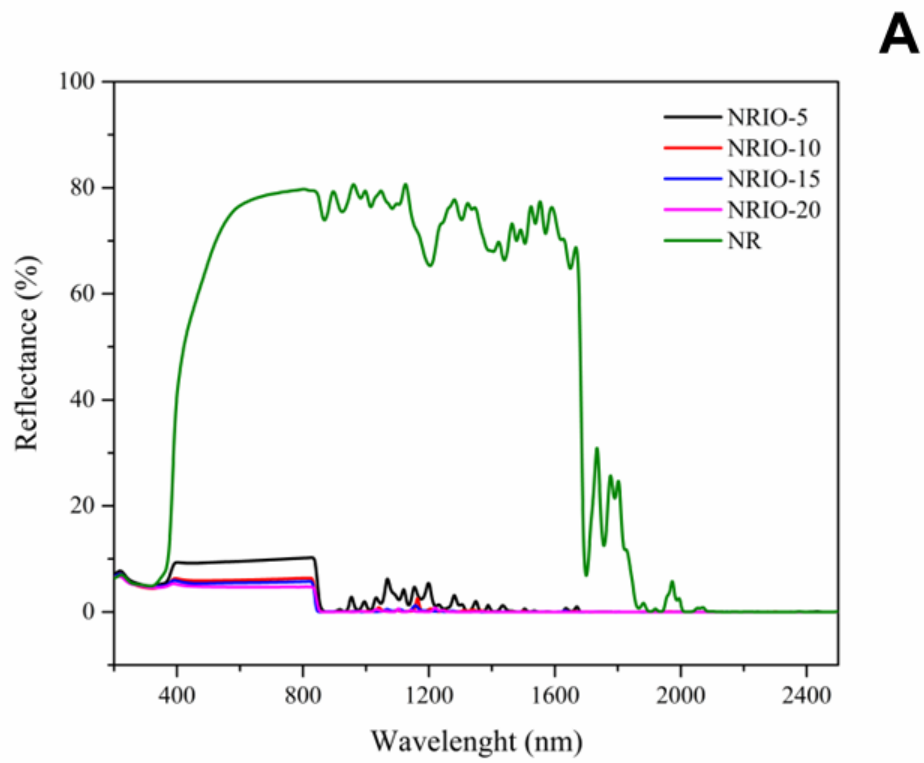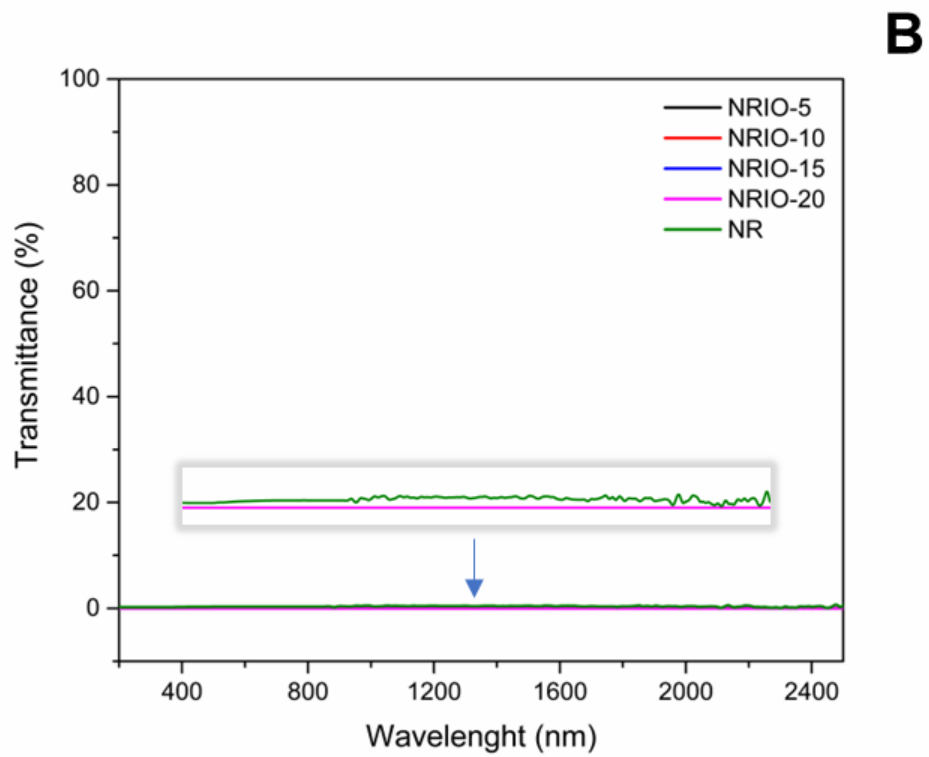

**Fig. S8** A) Reflectance and B) transmittance of all prepared samples

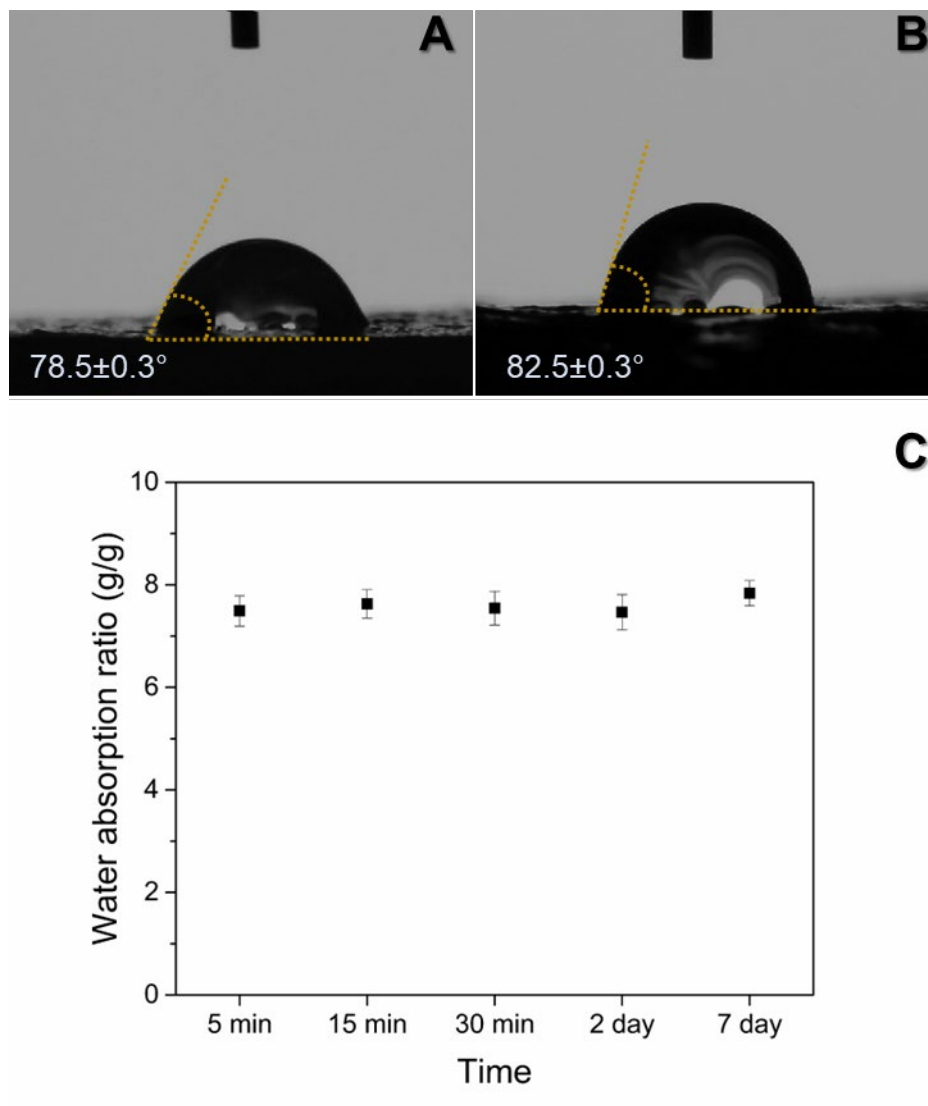

**Fig. S9** Water contact angle of A) NR and B) NRIO-20 and C) water absorption ratio of NRIO-20



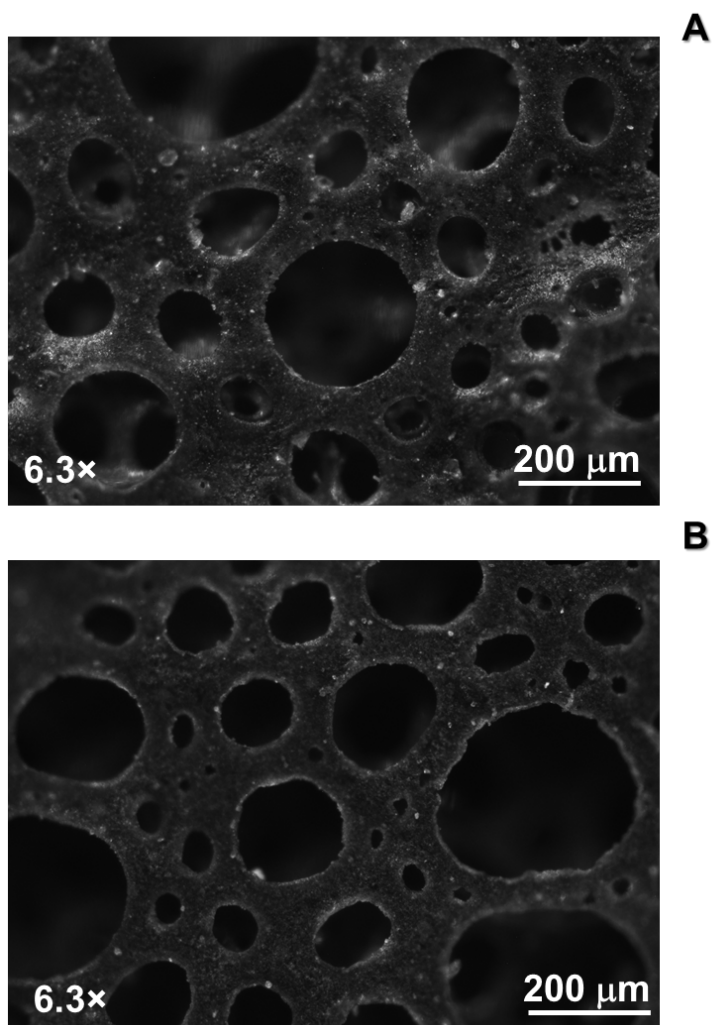

**Fig. S10** Optical microscope images (BX43F, Olympus) of NRIO-20 A) before and B) after ozone treatment for 72 h with an ozone concentration of 50 pphm and a temperature of 40°C

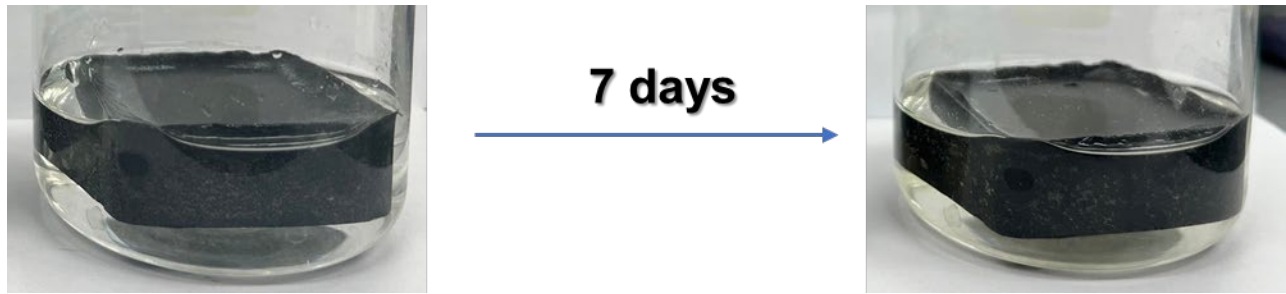

**Fig. S11** The process of chemical corrosion resistance test. The specimen was submerged in an acid solution (pH 1) for 7 days.

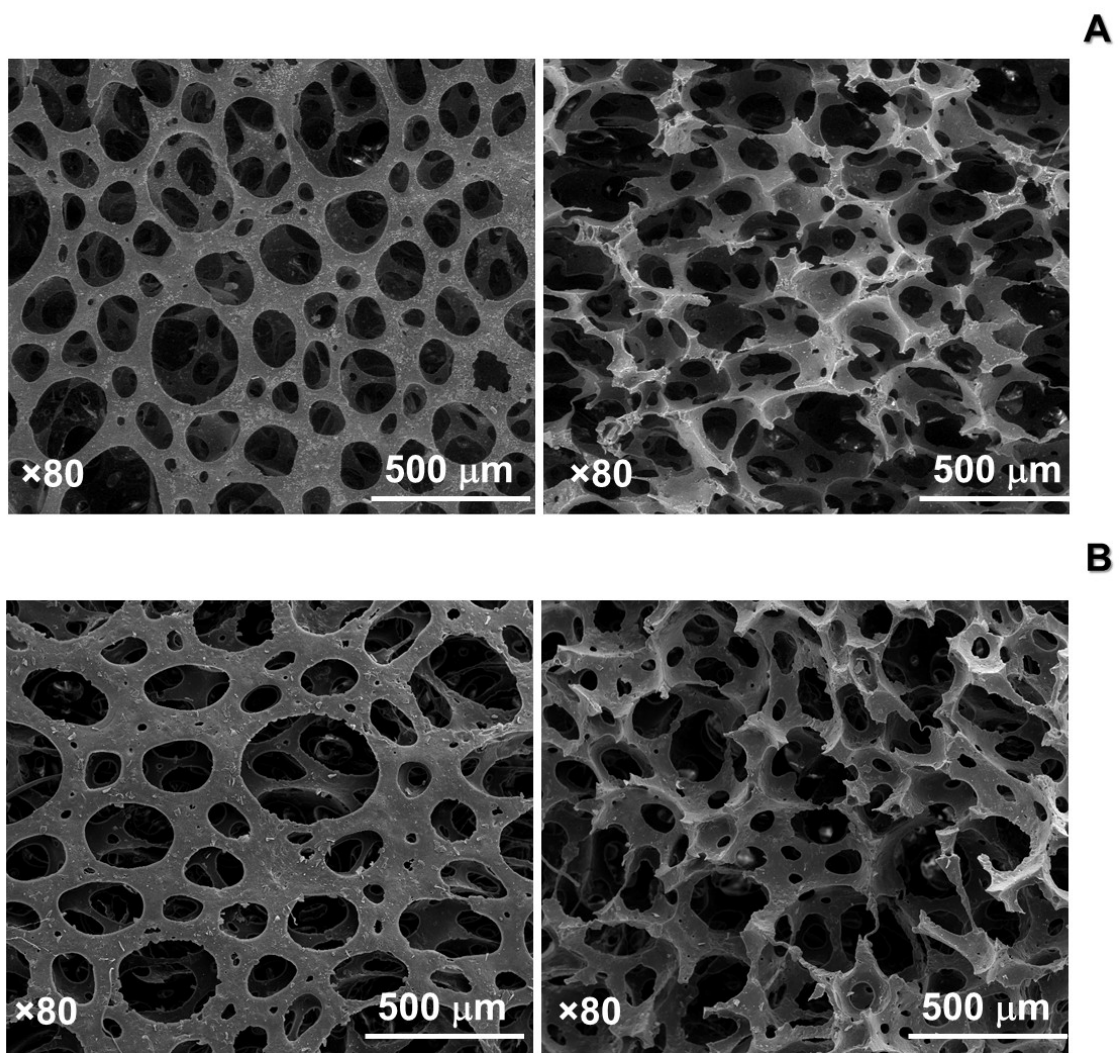

**Fig. S12** Surface and cross-sectional SEM images of NRIO-20 A) before and B) after acid treatment for one week

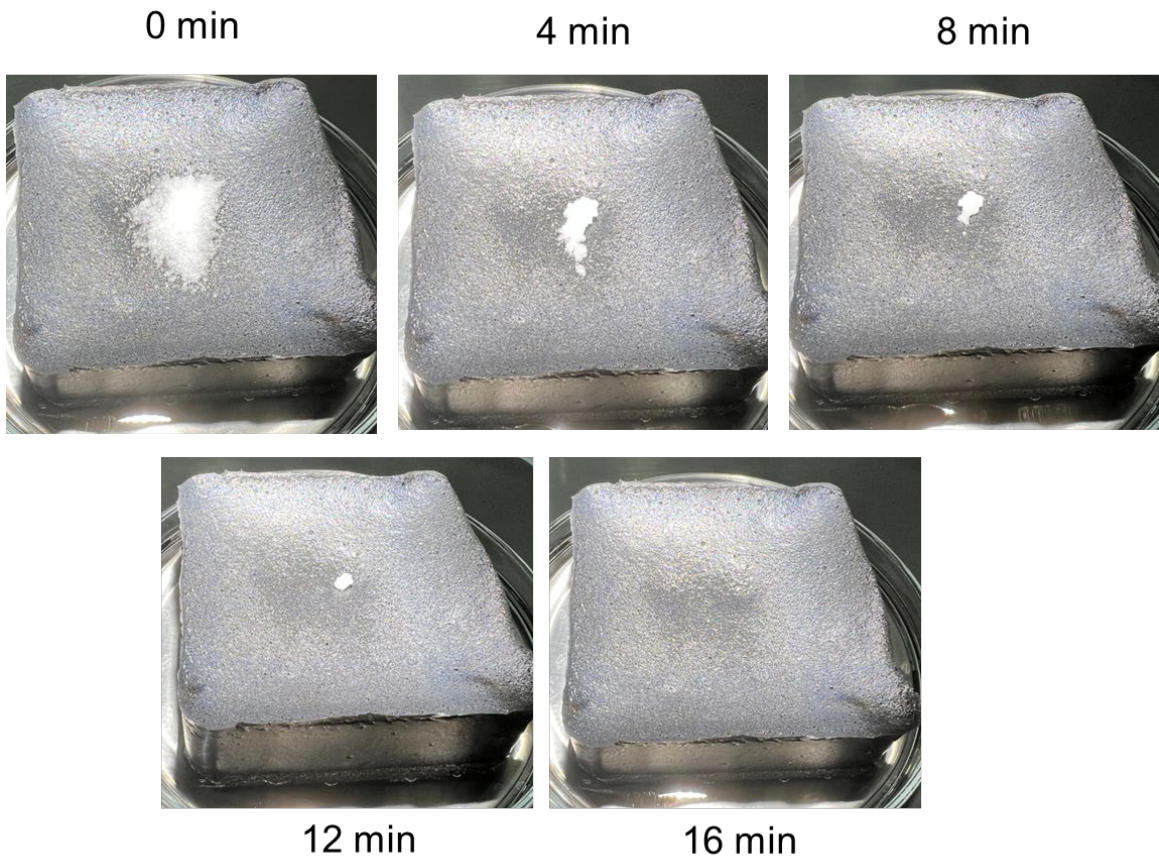

**Fig. S13** Salt was rejected by NRIO-20 in 16 mins

**Table S1** Comparison of solar absorbers under 1 sun irradiation

| Materials                                                                       | Fabrication procedure                                                                                                                                                                                                                                                                                                                                                                                                                                                                                                                                                                                                                                                                                                                                                                                                                                                                                                                                                                                                                                                                                                                                                                                                                                                                                                          | Light absorption (%) | Evaporation rate (kg/m <sup>2</sup> /h) | Thermal conductivity (W/m/K) | Efficiency (%) | Ref. |
|---------------------------------------------------------------------------------|--------------------------------------------------------------------------------------------------------------------------------------------------------------------------------------------------------------------------------------------------------------------------------------------------------------------------------------------------------------------------------------------------------------------------------------------------------------------------------------------------------------------------------------------------------------------------------------------------------------------------------------------------------------------------------------------------------------------------------------------------------------------------------------------------------------------------------------------------------------------------------------------------------------------------------------------------------------------------------------------------------------------------------------------------------------------------------------------------------------------------------------------------------------------------------------------------------------------------------------------------------------------------------------------------------------------------------|----------------------|-----------------------------------------|------------------------------|----------------|------|
| Fe <sub>3</sub> O <sub>4</sub> /polypyrrole-coated superhydrophilic porous foam | <ol style="list-style-type: none"> <li>1) Prepare hydrophilic porous polymer foam (HPSS) by a hydrothermal method from sodium <i>p</i>-styrene sulfonate</li> <li>2) Soak HPSS foam in a solution of FeCl<sub>3</sub>·6H<sub>2</sub>O and PVP for 48 h, then add N<sub>2</sub>H<sub>4</sub>·H<sub>2</sub>O into the solution and keep the temperature constant at 70°C for 6 h in an oil bath</li> <li>3) Wash the sample with distilled water and freeze-dry to obtain the black-grey foam</li> <li>4) Prepare HPSS/Fe<sub>3</sub>O<sub>4</sub>/PPy by alternately spraying solution A (ammonium persulfate) and solution B (pyrrole, IPA, and phytic acid) on the upper surface of HPSS/Fe<sub>3</sub>O<sub>4</sub> several times until the surface of HPSS/Fe<sub>3</sub>O<sub>4</sub> becomes completely black</li> <li>5) Wash the foam with DI water and then dry</li> </ol>                                                                                                                                                                                                                                                                                                                                                                                                                                             | 92                   | 1.51                                    | Dry=0.039                    | 94.7           | [1]  |
| Electrically conductive and magnetic carbon aerogel                             | <p><u>Preparation of magnetic waste paper (MWP) aerogels</u></p> <ol style="list-style-type: none"> <li>1) Soak shredded waste paper in DI water for 24 h and stir for 3 h</li> <li>2) Dilute the obtained waste paper pulp with DI water and then add sodium chlorite to the pulp</li> <li>3) Adjust to pH 4.5 followed by oxidation at 80°C for 2 h under mechanical stirring</li> <li>4) Wash the treated waste paper pulp with DI water and ethanol and then disperse it in ethanol</li> <li>5) Prepare iron solution by dissolving FeCl<sub>3</sub>·6H<sub>2</sub>O in ethylene glycol followed by adding the proper amount of sodium acetate and polyethylene glycol</li> <li>6) Add the paper pulp into the iron solution, stir for 1 h, and then seal the mixture at 200°C for 24 h to grow Fe<sub>3</sub>O<sub>4</sub> nanoparticles</li> <li>7) Wash the Fe<sub>3</sub>O<sub>4</sub>-modified cellulose with DI water and ethanol and then disperse it in ethanol</li> <li>8) Pour the suspension into a mold and then dry at 60°C for 6 h</li> </ol> <p><u>Preparation of magnetic carbon aerogels</u></p> <ol style="list-style-type: none"> <li>9) Pyrolyze the MWP aerogels at 200-1000°C under N<sub>2</sub> for 4 h</li> <li>10) Activate the external surface using O<sub>2</sub>-plasma for 2 min</li> </ol> | ~97                  | 1.46                                    | Dry=0.044                    | ~70.3%         | [2]  |
| Al-Ti-O PVDF hybrid membrane                                                    | <ol style="list-style-type: none"> <li>1) Ball-mill commercial Al and TiO<sub>2</sub> powder to obtain black Al-Ti-O hybrid</li> <li>2) Wash the ball-milled sample with 0.1M HCl, centrifuge, rinse</li> </ol>                                                                                                                                                                                                                                                                                                                                                                                                                                                                                                                                                                                                                                                                                                                                                                                                                                                                                                                                                                                                                                                                                                                | 90.23                | 1.24                                    | -                            | 77.52          | [3]  |

| Materials                                                                               | Fabrication procedure                                                                                                                                                                                                                                                                                                                                                                                                                                                                                                                                                                                                                                         | Light absorption (%) | Evaporation rate (kg/m <sup>2</sup> /h) | Thermal conductivity (W/m/K) | Efficiency (%) | Ref. |
|-----------------------------------------------------------------------------------------|---------------------------------------------------------------------------------------------------------------------------------------------------------------------------------------------------------------------------------------------------------------------------------------------------------------------------------------------------------------------------------------------------------------------------------------------------------------------------------------------------------------------------------------------------------------------------------------------------------------------------------------------------------------|----------------------|-----------------------------------------|------------------------------|----------------|------|
|                                                                                         | with DI water and ethanol multiple times, and dry at 60°C for 12h<br>3) Produce porous PVDF membrane with black Al-Ti-O hybrid using nonsolvent-induced phase inversion                                                                                                                                                                                                                                                                                                                                                                                                                                                                                       |                      |                                         |                              |                |      |
| Fe <sub>3</sub> O <sub>4</sub> /polyvinyl alcohol decorated delignified wood evaporator | 1) Soak wood sheets in 2 wt% NaClO <sub>2</sub> (pH 4.6) for various periods (0–10 h), rinse with a 1:1 mixture of ethanol and DI water, and then freeze-dry to obtain delignified wood<br>2) Add PVA in DI water and then heat at 80°C for 30 min<br>3) Add FeCl <sub>3</sub> in the PVA solution and remove bubbles using ultrasonic treatment<br>4) Coat the wooden substrates with the FeCl <sub>3</sub> /PVA suspension using a flexible writing brush, wipe excess solution off, and then blow with air to remove unattached particles<br>5) Heat coated samples at 120°C for 12 h                                                                      | ~97                  | 1.3                                     | Dry=0.22<br>Wet= 0.29        | 73             | [4]  |
| Fe <sub>3</sub> O <sub>4</sub> /diatomite-decorated cotton evaporator                   | 1) Tear the cotton into cotton wadding and stir it with Fe <sub>3</sub> O <sub>4</sub> dispersion for 6 h<br>2) Add diatomite and PVA to the dispersion, heat it to 80°C, and then stir until the surface water dries off<br>3) Press the material into the mold, dry it in an oven at 80°C for 12 h                                                                                                                                                                                                                                                                                                                                                          | 93.42                | 1.32                                    | -                            | 82.9           | [5]  |
| CuFeSe <sub>2</sub> NP-decorated wood membrane                                          | 1) Dissolve Cu(acac) <sub>2</sub> and Fe(acac) <sub>3</sub> in oleylamine and diphenyl ether and then stir under nitrogen<br>2) Dehydrate at 110°C for 1.5 h and then heat to 265°C for 1 h<br>3) Inject the mixture of diphenyl diselenide and oleylamine into the prepared solution and then stir for 1 h to obtain CuFeSe <sub>2</sub> NP<br>4) Add ethanol into the reaction mixture and then centrifuge<br>5) Rinse the particles with ethanol-petroleum ether to remove excess oleylamine and disperse the particles in chloroform<br>6) Submerge a piece of wood into the dispersion of CuFeSe <sub>2</sub> NPs and then vacuum until it becomes black | ~99                  | ~1.06                                   | Dry=0.12<br>Wet=0.525        | 67.7           | [6]  |
| Cotton-CuS nanocage agarose aerogel                                                     | 1) Disperse Cu <sub>2</sub> O in Milli-Q water and react it with thiourea at 90°C for 4 h to create CuS yolk-shell nanocages<br>2) Centrifuge and wash the obtained particles with water and ethanol several times<br>3) Disperse CuS nanocages, agarose, and urea in water and ethanol solution and stir at 80°C for 30 min<br>4) Pour the suspension onto a cotton pad, cool down, and then freeze dry                                                                                                                                                                                                                                                      | 97                   | 1.63                                    | Dry=0.04                     | 94.9           | [7]  |

| Materials                                                                  | Fabrication procedure                                                                                                                                                                                                                                                                                                                                                                                                                                                                          | Light absorption (%) | Evaporation rate (kg/m <sup>2</sup> /h) | Thermal conductivity (W/m/K) | Efficiency (%) | Ref.      |
|----------------------------------------------------------------------------|------------------------------------------------------------------------------------------------------------------------------------------------------------------------------------------------------------------------------------------------------------------------------------------------------------------------------------------------------------------------------------------------------------------------------------------------------------------------------------------------|----------------------|-----------------------------------------|------------------------------|----------------|-----------|
| Polypyrrole coated natural latex foam                                      | 1) Dip commercial natural rubber latex foam into 1% pyrrole aqueous solution for 2-3 h with proper back and forth extrusion<br>2) Add ammonium persulfate solution into the above solution<br>3) Polymerize in an ice bath for 6 h<br>4) Clean the sample with DI water                                                                                                                                                                                                                        | ~95                  | 1.76                                    | Dry=0.2257<br>Wet= 0.5199    | 98             | [8]       |
| Polydopamine coated natural rubber latex sponge                            | 1) Ultrasonically clean the natural rubber sponge with ethanol and DI water<br>2) Adjust the pH of dopamine solution to 8.5 with ammonia<br>3) Soak the natural rubber sponge in the dopamine solution at RT for 18 h<br>4) Rinse the sample with ethanol and vacuum-dry at 60°C                                                                                                                                                                                                               | -                    | 1.35                                    | -                            | 84.6           | [9]       |
| MXene and protonated-g-C <sub>3</sub> N <sub>4</sub> on natural latex foam | 1) Prepare MXene powder from Ti <sub>3</sub> AlC <sub>2</sub> and LiF in 9 M HCl solution, rinse with DI water, and dry overnight in a vacuum oven<br>2) Prepare g-C <sub>3</sub> N <sub>4</sub> by heating melamine in a furnace at 550°C, mix it into 2 M HNO <sub>3</sub> solution before placing in an oven for 4 h and then washing with DI water<br>3) Disperse MXene, g-C <sub>3</sub> N <sub>4</sub> , and PVA in DI water and then brush coat the mixture onto the natural latex foam | 93.1                 | 1.85                                    | -                            | 93.5           | [10]      |
| Iron oxide black/natural rubber composite sponge                           | 1) Blend the compounding formulation to produce natural rubber/iron oxide black composite sponge<br>2) Put the mixture into a silicone mold and vulcanize at 70°C for 2 h<br>3) Wash the composite sponge and dry it overnight at 90°C                                                                                                                                                                                                                                                         | 95                   | 1.20                                    | Dry=0.048<br>Wet=0.108       | 77.05          | This work |

**Table S2** Comparison of water quality

| Sample                                   | TDS (ppm)       | EC ( $\mu\text{S}/\text{cm}$ ) | References       |
|------------------------------------------|-----------------|--------------------------------|------------------|
| <b>Simulated seawater</b>                | <b>&gt;9990</b> | <b>43563.33</b>                | <b>This work</b> |
| <b>Condensed water</b>                   | <b>23</b>       | <b>53.16</b>                   | <b>This work</b> |
| <b>DI water</b>                          | <b>1</b>        | <b>9.10</b>                    | <b>This work</b> |
| Pacific Ocean water<br>(Before SWRO*)    | 39434           | 474.5                          | [11]             |
| Pacific Ocean water<br>(after SWRO)      | 409             | 8.1                            | [11]             |
| WHO recommendation<br>for drinking water | <500            | <1400                          | [12]             |

\* SWRO is the seawater reverse osmosis process

## References

1. J. X. He, F. Liu, C. H. Xiao, H. X. Sun, J. Y. Li, Z. Q. Zhu, W. D. Liang and A. Li,  $\text{Fe}_3\text{O}_4/\text{PPy}$ -coated superhydrophilic polymer porous foam: a double layered photothermal material with a synergistic light-to-thermal conversion effect toward desalination, *Langmuir*, 2021, **37**, 12397-12408.
2. L. X. Li, T. Hu, A. Li and J. P. Zhang, Electrically conductive carbon aerogels with high salt-resistance for efficient solar-driven interfacial evaporation, *ACS Appl. Mater. Interfaces.*, 2020, **12**, 32143-32153.
3. L. Yi, S. Ci, S. Luo, P. Shao, Y. Hou and Z. Wen, Scalable and low-cost synthesis of black amorphous Al-Ti-O nanostructure for high-efficient photothermal desalination, *Nano Energy*, 2017, **41**, 600-608.
4. L. Song, X.-F. Zhang, Z. Wang, T. Zheng and J. Yao,  $\text{Fe}_3\text{O}_4$ /polyvinyl alcohol decorated delignified wood evaporator for continuous solar steam generation, *Desalination*, 2021, **507**, 115024.

5. Z. Bai, H. Xu, B. Yang, J. Yao, G. Li, K. Guo, N. Wang and N. Liang, Fe<sub>3</sub>O<sub>4</sub>/diatomite-decorated cotton evaporator for continuous solar steam generation and water treatment, *Materials*, 2022, **15**, 6110.
6. H. Liu, C. Chen, H. Wen, R. Guo, N. A. Williams, B. Wang, F. Chen and L. Hu, Narrow bandgap semiconductor decorated wood membrane for high-efficiency solar-assisted water purification, *J. Mater. Chem. A.*, 2018, **6**, 18839-18846.
7. X. Wu, M. E. Robson, J. L. Phelps, J. S. Tan, B. Shao, G. Owens and H. Xu, A flexible photothermal cotton-CuS nanocage-agarose aerogel towards portable solar steam generation, *Nano Energy*, 2019, **56**, 708-715.
8. Y. Xu, J. Wang, F. Yu, Z. Guo, H. Cheng, J. Yin, L. Yan and X. Wang, Flexible and efficient solar thermal generators based on polypyrrole coated natural latex foam for multimedia purification, *ACS Sustain. Chem. Eng.*, 2020, **8**, 12053-12062.
9. H. Yu, Y. Shi, A. Ding, J. Liao, H. Gui and Y. Chen, Polydopamine-coated natural rubber sponge for highly efficient vapor generation, *Polymers*, 2022, **14**.
10. R. T. Ginting, H. Abdullah and V. Fauzia, Facile preparation of MXene and protonated-g-C<sub>3</sub>N<sub>4</sub> on natural latex foam for highly efficient solar steam generation, *Mater. Lett.*, 2022, **313**, 131779.
11. F. Pontius, Treatability of a highly-impaired, saline surface water for potential urban water use, *Water*, 2018, **10**, 324.
12. J. Kavindra, A. Churniya, Ravindra, V. Gatiyala, K. Chaudhary and S. Sharma, Evaluation of TDS and electrical conductivity in groundwater's of Udaipur, Rajasthan and its significance, *Int. J. Fish. Aquat. Stud.*, 2020, **8**, 203-206.
